# Supplementary material
Source: PubMed Central journal article supplement (PMC3929418)
Supplement: rna-11-10-s01.pdf [file rna-11-10-s01.pdf]

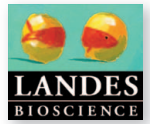

## **Supplemental Material to:**

**Nara Lee, Genaro Pimienta, Joan A Steitz, Walter N Moss**

**RNA families in Epstein–Barr virus**

**2013; 11(1)**

**<http://dx.doi.org/10.4161/rna.27488>**

**[www.landesbioscience.com/journals/rnabiology/article/27488/](http://www.landesbioscience.com/journals/rnabiology/article/27488/)**





```

# STOCKHOLM 1.0
#=GF ID      EBVSIS1
#=GF AC
#=GF DE      Epstein-Barr virus stable intronic sequence RNA (ebv-sisRNA-1)
#=GF AU      Moss W
#=GF SE      Published; PMID:17381320
#=GF SS      Published; PMID:17381320
#=GF TP      Gene; sisRNA;
#=GF RN      [1]
#=GF RM      23937650
#=GF RT      Genome-wide analyses of Epstein-Barr virus reveal conserved RNA structures and a novel
#=GF RT      stable intronic sequence RNA.
#=GF RA      Moss WM, Steitz JA;
#=GF RL      BMC Genomics 2013;14:543.
#=GF WK      http://en.wikipedia.org/
#=GF SQ      8

```

```

EBV1|NC_009334      GUAAGUGGAC-UUUAAUUUUUUUCUGCUAAGCCCAACACUCCACCACACCC
CeHV12|AF200364    GUAAGUGGACUUUUUCAUUUUUCUGCUAAGCCCAACACUCCACCACAGCC
MHV4|NC_006146     GUAAGUGGAC-UUUCAUUUUAUUCGCUAGCCCAACACUCCACCACACCC
PoHV3|AJ311194    GUAAGUGGAC-UUUAAAGUUUUUCUGCUAAGCCCAACAUUCCACCACACCC
HVMF1|X77781      -UAAGUGGAC-UUUCAGUUUAUUCUGCUAGCCCAACACUCCACCACACCC
CeHV15|AJ311199   GUAAGUGGAC-UCUUAGUUACUCUGCUAGCCCAACACUCCACCACACCC
CaHV3|NC_004367   GUAAGUGU---CUUUAAUUUUUAAGCCUCAUGCA-CAGCACACAAACACC
PoHV1|AJ311196    GUAAGUGGAC-UUUAAAGUUUUUCUGCUAAGCCCUACACUCCACCACACCC
#=GC SS_cons      .....<<<<<<.....>>>>>>.....

```

```

EBV1|NC_009334      AGGCACACA-----CUACA----CACACCCACCCGUCU-CAG
CeHV12|AF200364    AGGCACACA-----CUACA----CACACCCGCCCAUCU-CAG
MHV4|NC_006146     AGGCACACA-----CUACA----CACAGCCACCCAUUCU-CAG
PoHV3|AJ311194    AGGCACACA-----CUACA----CACACCCGCCCGACU-UAG
HVMF1|X77781      AGGCACACA-----CUACA----CACAGCCACCCGUCU-CAG
CeHV15|AJ311199   AGGCACACA-----CUACA----CACAGCCACCCGUCU-CAG
CaHV3|NC_004367   AGGCACACAAACAGCAGCCACACUCCACACGCGCCCGUCUCCAG
PoHV1|AJ311196    AGGCACACA-----CUACA----CACACCCACCCGUCU-CAG
#=GC SS_cons      .....

```

```
//
```





## **Supplementary files**

SI File 1. Stockholm alignment of conserved EBER2 sequences and consensus structure. Sequences are from three EBV strains: EBV1 (EBV type 1), GD1 (Guangdong 1), and GD2, as well as two from related lymphocryptoviruses: MHV4 and CeHV12. Base pairs indicated by matching "<" and ">" characters.

SI File 2. Stockholm alignment of conserved EBNA IRES sequences and consensus structure. Pseudoknot base pairs indicated by matching capital/lowercase letters "A/a" and "B/b" highlighted in green and blue, respectively.

SI File 3. Stockholm alignment of conserved ebv-sisRNA-1 sequences and consensus structure.

SI File 4. Stockholm alignment of conserved ebv-sisRNA-2 hairpin sequences and consensus structure.
